# Supplementary material
Source: Springer Nature journal article supplement (https://www.springermedizin.de/resource/supplementary/12958_2009_621_MOESM6_ESM.pdf/9568112)

A) SOD

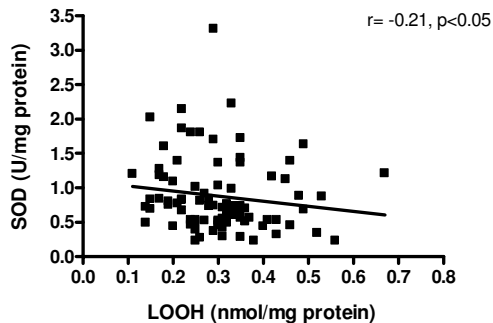

B) CAT

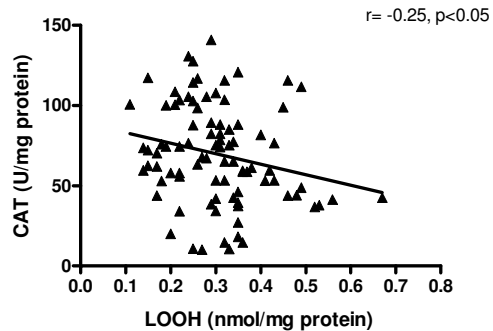

C) GPx

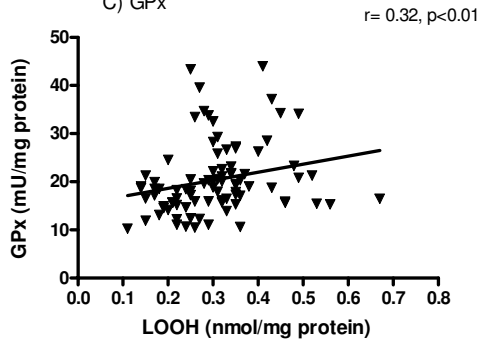

D) GR

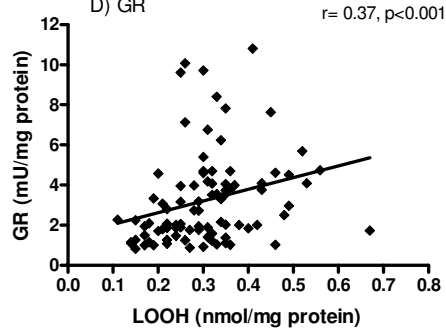

Supplement: MOESM6 [file 9568112]
